# Supplementary material
Source: PubMed Central journal article supplement (PMC2206562)

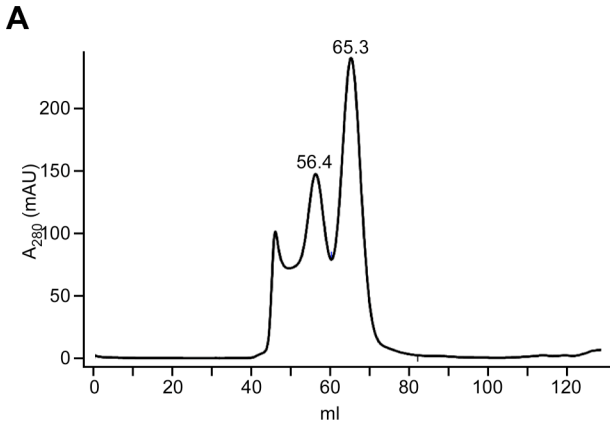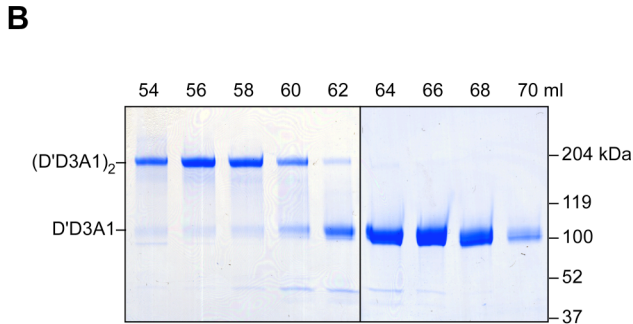

Supplement: pnas_0710079105_3.pdf [file pnas_0710079105_3.pdf]
